**Table S1. PCR protocols.**

| Gene                            | Primers               | Primer sequences 5'-3'                            | PCR cycles                                                                                                       | Amplicon length (bp) | Reference for primers |
|---------------------------------|-----------------------|---------------------------------------------------|------------------------------------------------------------------------------------------------------------------|----------------------|-----------------------|
| <b>mcrA -1</b>                  | mcrA-F                | GGTGGTGTMGGATTACACARTAYGCWACAGC                   | 3 min/95 °C;                                                                                                     | 488                  | [40]                  |
|                                 | mcrA-R                | TTCATTGCRTAGTTWGGRTAGTT                           | 30 x (1 min/94 °C, 1 min/52 °C, 1 min/72 °C);<br>10 min/72 °C                                                    |                      |                       |
| <b>mcrA - 2</b>                 | ME1-F                 | GCMATGCARATHGGWATGTC                              | 5 min/95 °C;                                                                                                     | 280                  | [41]                  |
|                                 | MCR1-R                | ARCCADATYTGRTCRTA                                 | 35 x (1 min/94 °C, 45 s/59 °C, 1 min/72 °C);<br>10 min/72 °C                                                     |                      |                       |
| <b>16S rRNA<br/>Archaea</b>     | Ar109-F               | ACKGCTCAGTAACACGT                                 | 2 min/95 °C;                                                                                                     | 806                  | [42]                  |
|                                 | Ar915-R               | GTGCTCCCCCGCCAATTCCT                              | 20 x (1 min/94 °C, 1 min/62** °C, 1 min/72 °C);<br>10 x (1 min/94 °C, 1 min/52 °C, 1 min/72 °C);<br>10 min/72 °C |                      |                       |
| <b>16S rRNA<br/>methanogens</b> | MG0357F-gc<br>MG0691R | (GC clamp*)CCCTACGGGGCGCAGCAG<br>GGATTACARGATTTAC | 3 min/94 °C;<br>35 x (30 s/94 °C, 30 s/53 °C, 1 min 30 s/72 °C);<br>5 min/72 °C                                  | 334                  | [43]                  |

\*GC clamp (CGCCCGCCGCGCGCGGGCGGGGCGGGGCGGGGGCACGGGGGG)

\*\* Touchdown cycling with decrease of 0.5 °C in each cycle
